# Supplementary material
Source: publisher figshare collection journal article supplement (https://future-science-group.figshare.com/articles/dataset/_/21269016)
Supplement: Supplementary file 1 [file 1]

Supplementary Table S1. Treatment elements of consolidation therapy in CCLG-ALL-2018.

|  |  | Treatment drug | Single or daily dose | Days of application |
| --- | --- | --- | --- | --- |
| LR |  |  |  |  |
|  | VD+MTX | DEX(PO) | 6mg/m2 | d1-5, d15-19, d29-33, d43-47 |
|  |  | VCR（IT） | 1.5mg/m2(max 2mg) | d1, d15, d29, d43 |
|  |  | MTX（PI） | 2g/m2 | d1, d15, d29, d43 |
|  | 6-MP+MTX | 6-MP(PO) | 25 mg/m2 /d | d1-≤56 |
|  |  | MTX(PI) | 2g/m2 | d1, d15, d29, d43 |
| IR |  |  |  |  |
|  | VD+MTX | DEX (PO) | 6mg/m2 | d1-5, d15-19, d29-33, d43-47 |
|  |  | VCR (IT) | 1.5mg/m2 (max 2mg) | d1, d15, d29, d43 |
|  |  | MTX (PI) | 5g/m2 | d1, d15, d29, d43 |
|  | 6-MP+MTX | 6-MP (PO) | 25 mg/m2 /d | d1-≤56 |
|  |  | MTX (PI) | 5g/m2 | d1, d15, d29, d43 |
| HR | (HR-1'/HR-2'/HR-3')×2 |  |  |  |
|  | HR-1' | Dex (PO/IT) | 20mg/m2/d | d1-5 |
|  |  | VCR (IT) | 1.5mg/m2 (max 2mg) | d1, d6 |
|  |  | MTX (PI) | 5g/m2 | d1 |
|  |  | CTX (IV) | 200mg/m2 | d2-4 (Q12H, total 5 doses) |
|  |  | MESNA (IV) | 70mg/m2 | CTX 0, 4, 8h |
|  |  | Ara-c (IV) | 2000mg/m2 | d5 (Q12H, total 2 doses) |
|  |  | VitB6 (PO/IV) | 150mg/m2 | d5 (Q12H, 2 hours after Ara-c,total 2 doses) |
|  |  | PEG-ASP (IM) | 2500u/m2 | d6 |
|  | HR-2' | Dex (PO/IT) | 20mg/m2/d | d1-5 |
|  |  | VDS (IT) | 3mg/m2 | d1,d6 |
|  |  | MTX(PI) | 5g/m2 | d1 |
|  |  | IFO (IV) | 800mg/m2 | d2-4 (Q12H,total 5 doses) |
|  |  | MESNA (IV) | 300mg/m2 | CTX 0, 4, 8h |
|  |  | DNR (IV) | 30mg/m2 | d5 |
|  |  | PEG-ASP (IM) | 2500u/m2 | d6 |
|  | HR-3' | Dex (PO/IT) | 20mg/m2/d | d1-5 |
|  |  | Ara-c(IV) | 2000mg/m2 | d1-2 (Q12H) |
|  |  | VitB6(PO/IV) | 150mg/m2 | d5 (Q12H,2 hours after Ara-c,total 2 doses) |
|  |  | VP-16(IV) | 100mg/m2 | d3-5 (Q12H,total 5 doses) |
|  |  | PEG-ASP(IM) | 2500u/m2 | d6 |

CCLG-ALL-2018, Chinese Leukemia Group protocol for Acute Lymphoblastic Leukemia 2018; PO, orally; IV, intravenous push; PI, intravenous infusion; LR, low risk ; IR, intermediate risk; HR, high risk; DEX, dexamethasone; VCR, vincristine; MTX, methotrexate; 6-MP, 6-mercaptopurine; CTX, cyclophosphamide; Ara-c, cytarabine; VitB6, Vitamin B6; PEG-ASP, pegaspargase; VDS, vindesine; IFO, ifosfamide; DNR, daunorubicin; VP-16, etoposide.
